# Supplementary material
Source: PubMed Central journal article supplement (PMC4815651)

**Figure S1: Parsimony-based haplotype networks for *Bufo balearicus*, and *B. viridis*.**

Ellipsoids represent existing haplotypes, with locality numbers of the populations where they occur; connection with a dash indicates single mutational steps; small empty dots symbolize the number of hypothetical haplotypes not found; the rectangle refers to the most frequent haplotype. For major clades, the bootstrap support from the Maximum-Likelihood phylogeny (not shown) is given.

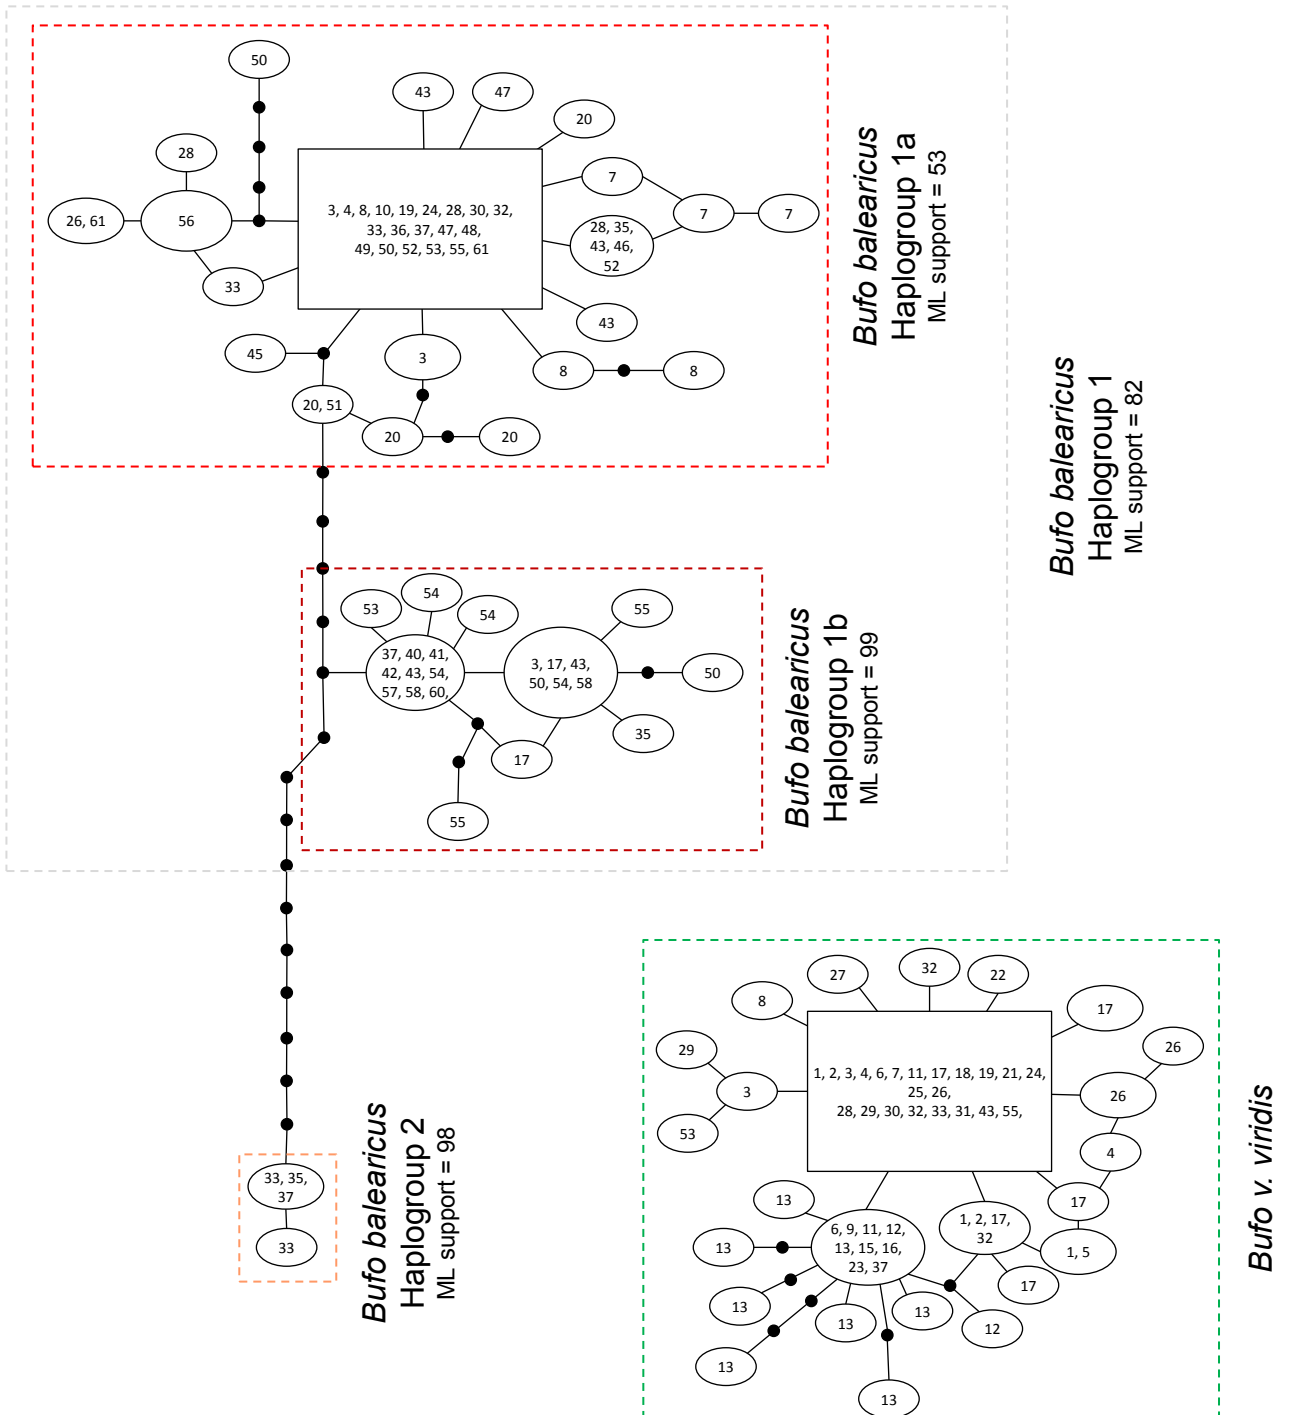

Supplement: hdy201426x1.pdf [file hdy201426x1.pdf]
