# Supplementary material
Source: PubMed Central journal article supplement (PMC4815651)
Supplement: hdy201426x2.pdf [file hdy201426x2.pdf]

**Figure S2: Bayesian-clustering assignment to parental, hybrid and backcrosses genotypic classes by the program NEWHYBRIDS.** Barplots from the analysis with STRUCTURE ( $K = 2$ ) are also provided to allow direct comparison.

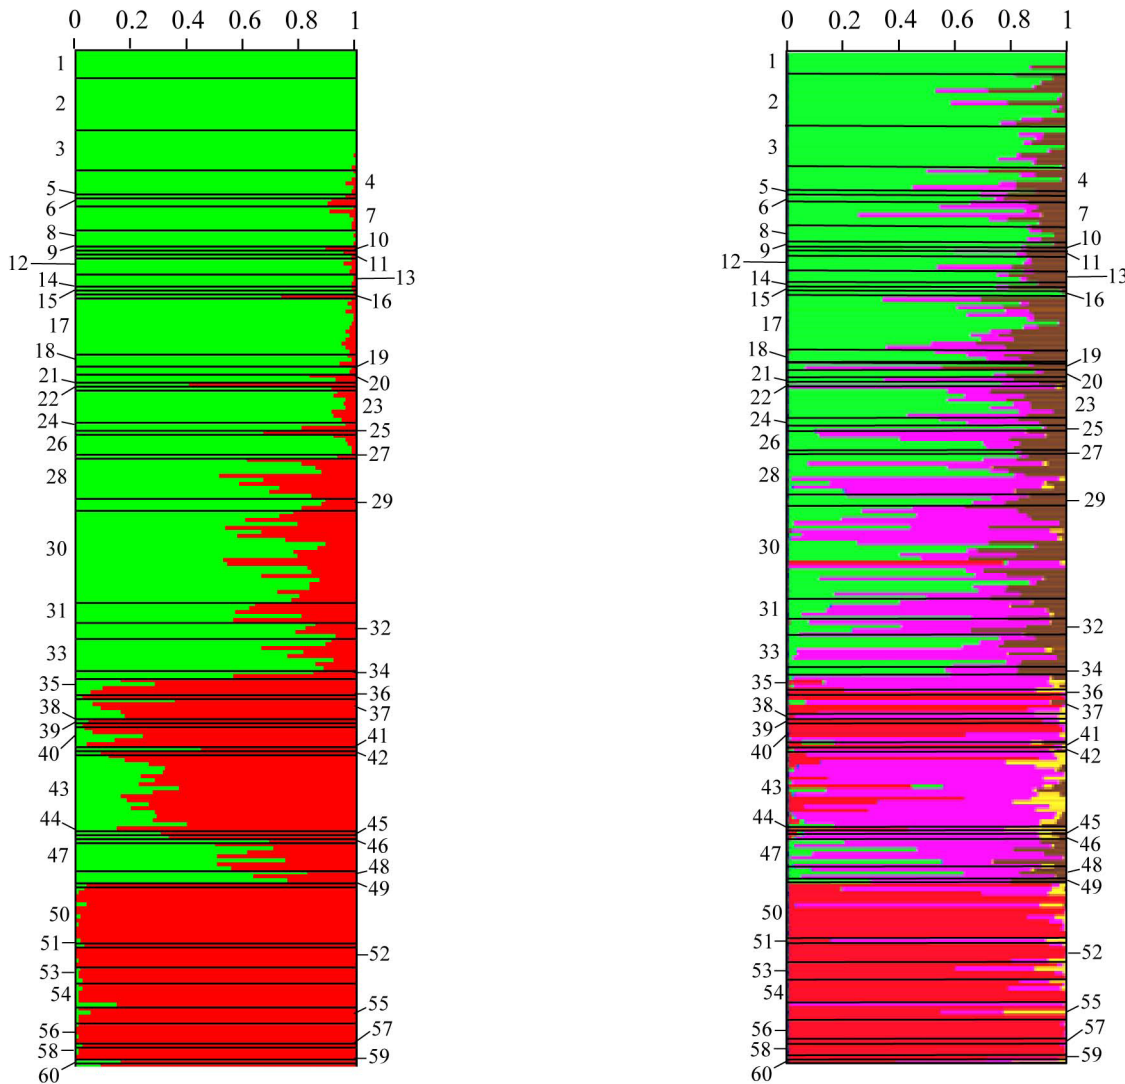

|                                         | 1-17 | 23-35 | 37-48 | 50-56 |
|-----------------------------------------|------|-------|-------|-------|
| <b>parental</b><br><i>viridis</i>       | 0.82 | 0.38  | 0.06  | 0     |
| <b>backcrossed</b><br><i>viridis</i>    | 0.11 | 0.16  | 0.05  | 0     |
| <b>F1</b>                               | 0    | 0     | 0     | 0     |
| <b>F2</b>                               | 0.07 | 0.42  | 0.59  | 0.1   |
| <b>backcrossed</b><br><i>balearicus</i> | 0    | 0     | 0.03  | 0.03  |
| <b>parental</b><br><i>balearicus</i>    | 0    | 0.04  | 0.27  | 0.87  |

**STRUCTURE probability of assignment**

█ *viridis*  
█ *balearicus*

**NEWHYBRIDS probability of assignment**

█ Parental - *viridis*      █ Backcrossed *viridis*  
█ Parental - *balearicus*      █ Backcrossed *balearicus*  
█ F1 hybrid  
█ F2 hybrid
