# Supplementary material
Source: PubMed Central journal article supplement (PMC4815651)
Supplement: hdy201426x3.pdf [file hdy201426x3.pdf]

**Table S1: Detailed sample information.** Samples from close localities with identical ID numbers (followed by a letter, e.g. 43a, 43b, etc.) were pooled together for population genetics analyses (see Methods for details).

Museum codes: MSNVE = Museo di Storia Naturale di Venezia (Venice, Italy); MCSNFE = Museo Civico di Storia Naturale di Ferrara (Ferrara, Italy).

| LocNumber | Province     | Name of locality                                    | lat (N) (dec) | long (E) (dec) | Sample Size | Sample Ids                                                                                                           | Age                     | Date (dd-mm-yyyy)                                                                  | Collector                             | Museum Voucher ID                                  |
|-----------|--------------|-----------------------------------------------------|---------------|----------------|-------------|----------------------------------------------------------------------------------------------------------------------|-------------------------|------------------------------------------------------------------------------------|---------------------------------------|----------------------------------------------------|
| 1         | Treviso      | Nervosa della Battaglia, Piave river bed            | 45.849388     | 12.148934      | 7           | BV215, BV247, BV248, BV433-BV436                                                                                     | Juvenile                | 26-06-2009                                                                         | N. Novarini, E. Romanazzi             | -                                                  |
| 2         | Treviso      | Cusignana Basser                                    | 45.7836       | 12.1942        | 18          | BV261, BV265, BV266, BV268, BV270, BV272, BV274, BV278, BV282, BV283, BV290-BV292, BV294, BV296, BV428, BV429, BV432 | Adult/Juvenile/Tadpole  | 04-05-2009, 02-06-2009, 14-05-2009, 29-06-2009, 06-07-2009, 30-08-2009, 21-09-2009 | L. Bonato                             | -                                                  |
| 3         | Treviso      | Montebelluna, San Gaetano, via De Chirico           | 45.757811     | 12.052397      | 18          | BV187-BV195, BV199, BV202-BV206, BV208, BV209, BV211                                                                 | Adult/Subadult/Tadpole  | 26-06-2009                                                                         | N. Novarini, E. Romanazzi, S. Bertolo | -                                                  |
| 4         | Padova       | Onara, via Pastozzo                                 | 45.630814     | 11.826161      | 8           | BV243-BV245, BV454, BV455, BV457, BV459, BV461                                                                       | Subadult                | 01-07-2009, 01-09-2009                                                             | S. Bertolo                            | -                                                  |
| 5         | Venezia      | Jesolo, via Meucci                                  | 45.545747     | 12.649278      | 1           | BV246                                                                                                                | Subadult                | 11-07-2009                                                                         | N. Novarini                           | -                                                  |
| 6         | Venezia      | Favaro Veneto, Ca' Colombara                        | 45.523584     | 12.290182      | 2           | BV016, BV019                                                                                                         | Adult                   | 09-04-2005, 28-04-1995                                                             | M. Semenzato                          | MSNVE-18890, MSNVE-6342                            |
| 7         | Venezia      | Salzano, Oasi Cave di Salzano                       | 45.530642     | 12.133489      | 7           | BV121, BV125, BV129, BV135, BV138, BV139, BV149                                                                      | Tadpole                 | 09-05-2009                                                                         | N. Novarini, M. Semenzato             | MSNVE-19858                                        |
| 8         | Venezia      | Mestre, Bissuola, Parco Albanese                    | 45.499128     | 12.261458      | 6           | BV032, BV035, BV038, BV043, BV045, BV437                                                                             | Adult/Tadpole           | 23-06-2008, 04-06-2008, 21-06-2008, 06-04-2009                                     | N. Novarini                           | MSNVE-19810, MSNVE-19807, MSNVE-19809, MSNVE-19817 |
| 9         | Venezia      | Campalto, via Passo                                 | 45.480663     | 12.300567      | 1           | BV021                                                                                                                | Juvenile                | 30-09-2003                                                                         | M. Semenzato                          | MSNVE-17787                                        |
| 10        | Venezia      | Porto Marghera                                      | 45.448175     | 12.234939      | 2           | BV037, BV053                                                                                                         | Adult                   | 19-05-2008, oct-2008                                                               | M. Semenzato                          | -                                                  |
| 11        | Venezia      | Treponti, via Ca' Tiepolo                           | 45.466061     | 12.455006      | 3           | BV056, BV058, BV062                                                                                                  | Tadpole                 | 01-05-2009                                                                         | N. Novarini                           | -                                                  |
| 12        | Venezia      | Island of S. Erasmo                                 | 45.459632     | 12.420767      | 6           | BV014, BV463, BV465, BV466, BV469, BV470                                                                             | Adult/Juvenile          | 30-10-2003, 04-10-2009                                                             | N. Novarini, S. Bertolo               | MSNVE-18958                                        |
| 13a       | Venezia      | Venezia, Giardini della Biennale                    | 45.428876     | 12.35996       | 10          | BV007-BV012, BV024-BV027                                                                                             | Adult/Tadpole           | apr-2008, 09-05-2008                                                               | F. Di Montereale, N. Novarini         | MSNVE-19319, MSNVE-19320                           |
| 13b       | Venezia      | Venezia, viale Garibaldi                            | 45.432003     | 12.354873      | 4           | BV028-BV031                                                                                                          | Tadpole                 | 09-05-2008                                                                         | N. Novarini                           | MSNVE-19321                                        |
| 14        | Venezia      | Island of Lido di Venezia, S. Nicolò                | 45.423028     | 12.338032      | 2           | BV040, BV474                                                                                                         | Tadpole/Adult           | 11-06-2008, 15-10-2009                                                             | N. Novarini                           | MSNVE-19808                                        |
| 15        | Venezia      | Island of Lido di Venezia, Alberoni                 | 45.342015     | 12.323665      | 4           | BV001, BV004                                                                                                         | Tadpole                 | 26-04-2008                                                                         | N. Novarini                           | MSNVE-19318                                        |
| 16        | Venezia      | Sambuson, via Calceoli                              | 45.401269     | 12.100339      | 1           | BV216                                                                                                                | Adult                   | 30-06-2009                                                                         | B. Favaretto                          | -                                                  |
| 17a       | Vicenza      | Rettorgole, strada Maglio di Lobia                  | 45.578786     | 11.522756      | 2           | BV054, BV096                                                                                                         | Adult                   | 22-04-2009                                                                         | N. Novarini                           | -                                                  |
| 17b       | Vicenza      | Vicenza, viale Ferrarini                            | 45.566042     | 11.529008      | 10          | BV065, BV074, BV097, BV105, BV163-BV166, BV185, BV186                                                                | Adult/Subadult/Tadpole  | 06-05-2009                                                                         | N. Novarini                           | MSNVE-19827                                        |
| 17c       | Vicenza      | Rettorgole, via Madra Teresa di Calcutta            | 45.586392     | 11.522336      | 1           | BV076                                                                                                                | Tadpole                 | 06-05-2009                                                                         | N. Novarini                           | -                                                  |
| 17d       | Vicenza      | Vicenza, N of via Monzambano                        | 45.566203     | 11.53255       | 2           | BV079, BV095                                                                                                         | Tadpole                 | 06-05-2009                                                                         | N. Novarini                           | -                                                  |
| 17e       | Vicenza      | Vicenza, via Crosetella                             | 45.576033     | 11.533933      | 2           | BV167, BV168                                                                                                         | Juvenile/Subadult       | 27-05-2009                                                                         | N. Novarini                           | -                                                  |
| 18        | Padova       | Abano Terme, via S. Antonio                         | 45.379253     | 11.804947      | 3           | BV155, BV158, BV162                                                                                                  | Tadpole                 | 08-05-2009                                                                         | P. Reggiani                           | -                                                  |
| 19        | Padova       | Legnaro                                             | 45.340967     | 11.962922      | 2           | BV417, BV419                                                                                                         | -                       | 16-09-2009, 17-07-2009                                                             | M. Simonazzi                          | -                                                  |
| 20        | Padova       | Rosara di Codevigo, via S. Daniele                  | 45.288728     | 12.099697      | 4           | BV181-BV184                                                                                                          | Subadult                | apr-2009                                                                           | M. Uliana                             | -                                                  |
| 21        | Padova       | Arzzergrande                                        | 45.270562     | 12.065778      | 1           | BV414                                                                                                                | -                       | 16-09-2009                                                                         | M. Simonazzi                          | -                                                  |
| 22        | Padova       | Brugine                                             | 45.280953     | 11.994953      | 1           | BV418                                                                                                                | -                       | 16-09-2009                                                                         | M. Simonazzi                          | -                                                  |
| 23        | Venezia      | Island of Pellestrina                               | 45.297312     | 12.309204      | 8           | BV013, BV438, BV440, BV442, BV443, BV446, BV448, BV450                                                               | Adult                   | oct-2004, 11-07-2009                                                               | G. Salvagno, N. Novarini              | MSNVE-18957, MSNVE-20172                           |
| 24        | Vicenza      | Albittero                                           | 45.43005      | 11.6038        | 4           | BV383, BV386                                                                                                         | Adult                   | -                                                                                  | F. Ficetola                           | -                                                  |
| 25        | Vicenza      | Caldero, Caldierino                                 | 45.418667     | 11.115         | 1           | BV424                                                                                                                | Adult                   | 24-05-2009                                                                         | F. Ballarín                           | -                                                  |
| 26a       | Vicenza      | Novolodo, near Alonte                               | 45.3575       | 11.4392        | 1           | BV324                                                                                                                | -                       | 29-06-2009                                                                         | M. Dovigo                             | -                                                  |
| 26b       | Vicenza      | Spessa, near Orgiano                                | 45.3436       | 11.4433        | 6           | BV336, BV337, BV339, BV342, BV343, BV346, BV347, BV349                                                               | -                       | 29-06-2009                                                                         | M. Dovigo                             | -                                                  |
| 27        | Vicenza      | Campiglia dei Berici                                | 45.3222       | 11.5339        | 1           | BV249                                                                                                                | -                       | 06-08-2009                                                                         | M. Dovigo                             | -                                                  |
| 28        | Verona       | Cologna Veneta                                      | 45.3113       | 11.3855        | 10          | BV250-BV259                                                                                                          | -                       | 14-07-2009, 17-07-2009, 03-08-2009                                                 | M. Dovigo                             | -                                                  |
| 29        | Padova       | Santa Croce                                         | 45.2544       | 11.5806        | 3           | BV325, BV328, BV332                                                                                                  | Tadpole                 | 29-05-2009                                                                         | M. Dovigo                             | -                                                  |
| 30a       | Padova       | Monselice, Museo delle macchine termiche "Centanin" | 45.243511     | 11.746386      | 11          | BV232-BV242                                                                                                          | Tadpole                 | 03-07-2009                                                                         | N. Novarini, S. Semenzato             | -                                                  |
| 30b       | Padova       | W of Monselice                                      | 45.238        | 11.7263        | 12          | Po10-Po21                                                                                                            | Adult                   | -                                                                                  | M. Stoeck                             | -                                                  |
| 31        | Padova       | Vetta, near Monselice                               | 45.223369     | 11.772256      | 5           | BV227-BV231                                                                                                          | Adult/Juvenile          | 03-07-2009                                                                         | N. Novarini, S. Semenzato, E. Cirani  | -                                                  |
| 32a       | Padova       | Megliadino San Fidenzo                              | 45.2236       | 11.5219        | 10          | BV305-BV312, BV318, BV322                                                                                            | Adult/Juvenile          | 03-06-2009, 12-06-2009, 22-07-2009                                                 | M. Dovigo                             | -                                                  |
| 32b       | Padova       | Santa Margherita d'Adige                            | 45.203        | 11.537         | 3           | BV376-BV378                                                                                                          | Tadpole                 | may-2009                                                                           | F. Ficetola                           | -                                                  |
| 33a       | Padova       | Leonore, near Piacenza d'Adige                      | 45.1228       | 11.5286        | 2           | BV302, BV303                                                                                                         | -                       | 03-07-2009                                                                         | M. Dovigo                             | -                                                  |
| 33b       | Padova       | Piacenza d'Adige                                    | 45.124        | 11.527         | 3           | BV379, BV381, BV382                                                                                                  | Tadpole                 | may-2009                                                                           | F. Ficetola                           | -                                                  |
| 33c       | Vicenza      | Masi                                                | 45.1237       | 11.5302        | 3           | BV387, BV388, BV391                                                                                                  | Adult                   | -                                                                                  | F. Ficetola                           | -                                                  |
| 34        | Venezia      | Isola Verde                                         | 45.1681       | 12.3264        | 2           | BV297, BV301                                                                                                         | -                       | June-2009                                                                          | L. Bedin                              | -                                                  |
| 35        | Venezia      | San'Anna di Chioggia, Bosco Nordio                  | 45.120797     | 12.261383      | 4           | BV049-BV052                                                                                                          | Adult/Juvenile          | 17-05-2008                                                                         | J. Richard                            | -                                                  |
| 36        | Rovigo       | Norge Polesine                                      | 45.065895     | 12.226194      | 1           | BV475                                                                                                                | Adult                   | 23-10-2009                                                                         | E. Boschetti                          | MSNVE-20402                                        |
| 37        | Rovigo       | SE of Rosolina                                      | 45.05646      | 12.27377       | 5           | Po5-Po9                                                                                                              | Adult                   | -                                                                                  | M. Stoeck                             | -                                                  |
| 38        | Rovigo       | Scanarello                                          | 45.013839     | 12.392164      | 1           | BV472                                                                                                                | Adult                   | 12-09-2009                                                                         | M. Benà                               | -                                                  |
| 39        | Rovigo       | Ca' Venier                                          | 44.959047     | 12.33642       | 1           | BV471                                                                                                                | Subadult                | 2009                                                                               | M. Benà                               | MSNVE-20403                                        |
| 40        | Rovigo       | Bottrighe, near Adria                               | 45.023825     | 12.086782      | 5           | BV487-BV491                                                                                                          | Adult/Subadult/Juvenile | 02-11-2009                                                                         | M. Benà                               | -                                                  |
| 41        | Rovigo       | Baricetta                                           | 45.060964     | 11.992342      | 1           | BV223                                                                                                                | Adult                   | 28-06-2009                                                                         | M. Benà                               | -                                                  |
| 42        | Rovigo       | Pezzoli                                             | 45.044842     | 11.931614      | 1           | BV224                                                                                                                | Adult                   | 28-06-2009                                                                         | M. Benà                               | -                                                  |
| 43a       | Rovigo       | Rovigo, via Chiarugi                                | 45.078719     | 11.779928      | 17          | BV169-BV179, BV217-BV222                                                                                             | Adult/Subadult/Tadpole  | 05-06-2009, 29-06-2009                                                             | N. Novarini, M. Semenzato, M. Benà    | MSNVE-19857                                        |
| 43b       | Rovigo       | Rovigo: vicolo Pierluigi da Palestrina              | 45.074871     | 11.777986      | 1           | BV476                                                                                                                | Adult                   | 16-10-2009                                                                         | M. Benà                               | -                                                  |
| 43c       | Rovigo       | Granzette, near Rovigo                              | 45.090121     | 11.773524      | 1           | BV485                                                                                                                | Adult                   | 21-03-2010                                                                         | M. Benà                               | -                                                  |
| 44        | Rovigo       | San'Apollinare                                      | 45.040178     | 11.822989      | 1           | BV225                                                                                                                | Adult                   | 28-06-2009                                                                         | M. Benà                               | -                                                  |
| 45        | Rovigo       | Crespino, Selva                                     | 44.998829     | 11.849532      | 1           | BV486                                                                                                                | Adult                   | 15-05-2010                                                                         | M. Benà                               | -                                                  |
| 46        | Rovigo       | Fratta Polesine, Piazon                             | 45.003881     | 11.845275      | 1           | BV226                                                                                                                | Adult                   | June-2009                                                                          | M. Benà                               | -                                                  |
| 47a       | Verona       | Isola della Scala                                   | 45.243611     | 11.011667      | 5           | BV477-BV481                                                                                                          | -                       | 02-10-2009                                                                         | B. Goffieri                           | -                                                  |
| 47b       | Verona       | Isola della Scala, Mandello                         | 45.279444     | 11.01          | 2           | BV482, BV483                                                                                                         | Adult                   | 19-09-2009                                                                         | B. Goffieri                           | -                                                  |
| 48        | Verona       | Cerea                                               | 45.192694     | 11.212709      | 3           | BV425-BV427                                                                                                          | -                       | aug-2009, sept-2009                                                                | R. Pollo                              | -                                                  |
| 49        | Mantova      | Ostiglia                                            | 45.073328     | 11.123364      | 1           | BV412                                                                                                                | -                       | 28-06-2009                                                                         | M. Simonazzi                          | -                                                  |
| 50        | Mantova      | Suzzara                                             | 45.041853     | 10.694236      | 14          | BV398-BV411                                                                                                          | -                       | 28-09-2009                                                                         | M. Simonazzi                          | -                                                  |
| 51        | Mantova      | San Benedetto Po                                    | 45.036835     | 10.879269      | 1           | BV397                                                                                                                | -                       | 28-09-2009                                                                         | M. Simonazzi                          | -                                                  |
| 52        | Mantova      | Peggognaga                                          | 44.987762     | 10.869636      | 5           | BV420-BV424                                                                                                          | -                       | 06-07-2009, 26-09-2009                                                             | M. Simonazzi                          | -                                                  |
| 53        | Ferrara      | Francolino                                          | 44.901761     | 11.661014      | 4           | BV382-BV395                                                                                                          | Adult                   | -                                                                                  | S. Mazzotti                           | -                                                  |
| 54        | Ferrara      | Ferrara                                             | 44.826944     | 11.609167      | 6           | BV350-BV353, BV366, BV367                                                                                            | Adult/Tadpole           | 26-03-1991, 07-05-2009                                                             | S. Mazzotti                           | MCSNFE-AN0015, MCSNFE-AN447                        |
| 55        | Bologna      | Oasi Ca' la Rizza, near Altedo                      | 44.867505     | 11.448277      | 1           | Po1-Po4                                                                                                              | Adult                   | -                                                                                  | M. Stoeck                             | -                                                  |
| 56        | Modena       | Campogalliano                                       | 44.6975       | 10.845556      | 5           | BV358-BV362                                                                                                          | Tadpole                 | 30-05-2009                                                                         | S. Mazzotti                           | MCSNFE-AN445                                       |
| 57        | Ravenna      | Castellorselli                                      | 44.553804     | 12.278386      | 1           | BV493                                                                                                                | Egg                     | 24-03-2010                                                                         | D. Miserozchi                         | -                                                  |
| 58        | Ravenna      | Bagnacavallo                                        | 44.429167     | 11.971389      | 3           | BV363-BV365                                                                                                          | Tadpole                 | 26-05-2009                                                                         | S. Mazzotti                           | MCSNFE-AN446                                       |
| 59        | Ravenna      | Rusci                                               | 44.412222     | 12.031667      | 1           | BV357                                                                                                                | Adult                   | -                                                                                  | S. Mazzotti                           | MCSNFE-AN0412                                      |
| 60        | Ravenna      | Campiano                                            | 44.297611     | 12.195643      | 1           | BV492                                                                                                                | Tadpole                 | 10-04-2010                                                                         | D. Miserozchi                         | -                                                  |
| 61        | Milano       | Milano                                              | 45.43         | 9.17           | 2           | BV374, BV375                                                                                                         | Adult                   | 03-07-2009                                                                         | F. Ficetola                           | -                                                  |
| 62        | Forlì-Cesena | Ronco                                               | 44.202778     | 12.078889      | 1           | BV355                                                                                                                | Tadpole                 | June-1989                                                                          | S. Mazzotti                           | MCSNFE-AN163b                                      |
| 63        | Rovigo       | Rosolina Mare                                       | 45.134925     | 12.32353       | 1           | BV022                                                                                                                | Adult                   | 1965?                                                                              | -                                     | MSNVE-884                                          |
