# Supplementary material
Source: PubMed Central journal article supplement (PMC4815651)
Supplement: hdy201426x4.pdf [file hdy201426x4.pdf]

**Table S2: Pairwise  $F_{ST}$  matrix between populations where  $n \geq 5$  individuals (computed from 12 microsatellite genotypes).** Pure *B. viridis* and *B. balearicus* populations (according to STRUCTURE assignments based from the same dataset) are labeled in green and red respectively. Admixed populations are indicated in yellow.

|    | 1    | 2    | 3    | 4    | 7    | 17   | 23   | 26   | 28   | 30   | 31   | 33   | 37   | 40   | 43   | 47   | 50   | 52   | 54   | 56   |  |
|----|------|------|------|------|------|------|------|------|------|------|------|------|------|------|------|------|------|------|------|------|--|
| 1  | 0.00 |      |      |      |      |      |      |      |      |      |      |      |      |      |      |      |      |      |      |      |  |
| 2  | 0.13 | 0.00 |      |      |      |      |      |      |      |      |      |      |      |      |      |      |      |      |      |      |  |
| 3  | 0.12 | 0.12 | 0.00 |      |      |      |      |      |      |      |      |      |      |      |      |      |      |      |      |      |  |
| 4  | 0.13 | 0.05 | 0.09 | 0.00 |      |      |      |      |      |      |      |      |      |      |      |      |      |      |      |      |  |
| 7  | 0.19 | 0.14 | 0.13 | 0.05 | 0.00 |      |      |      |      |      |      |      |      |      |      |      |      |      |      |      |  |
| 17 | 0.13 | 0.12 | 0.03 | 0.07 | 0.11 | 0.00 |      |      |      |      |      |      |      |      |      |      |      |      |      |      |  |
| 23 | 0.13 | 0.13 | 0.08 | 0.07 | 0.12 | 0.10 | 0.00 |      |      |      |      |      |      |      |      |      |      |      |      |      |  |
| 26 | 0.16 | 0.14 | 0.10 | 0.05 | 0.11 | 0.12 | 0.06 | 0.00 |      |      |      |      |      |      |      |      |      |      |      |      |  |
| 28 | 0.24 | 0.16 | 0.16 | 0.08 | 0.19 | 0.11 | 0.16 | 0.11 | 0.00 |      |      |      |      |      |      |      |      |      |      |      |  |
| 30 | 0.11 | 0.09 | 0.06 | 0.05 | 0.09 | 0.03 | 0.04 | 0.06 | 0.12 | 0.00 |      |      |      |      |      |      |      |      |      |      |  |
| 31 | 0.18 | 0.16 | 0.09 | 0.05 | 0.08 | 0.07 | 0.07 | 0.06 | 0.10 | 0.03 | 0.00 |      |      |      |      |      |      |      |      |      |  |
| 33 | 0.16 | 0.16 | 0.06 | 0.05 | 0.06 | 0.02 | 0.06 | 0.07 | 0.10 | 0.02 | 0.00 | 0.00 |      |      |      |      |      |      |      |      |  |
| 37 | 0.36 | 0.27 | 0.25 | 0.17 | 0.24 | 0.16 | 0.19 | 0.22 | 0.13 | 0.15 | 0.10 | 0.10 | 0.00 |      |      |      |      |      |      |      |  |
| 40 | 0.40 | 0.28 | 0.28 | 0.17 | 0.28 | 0.18 | 0.21 | 0.28 | 0.17 | 0.16 | 0.18 | 0.16 | 0.00 | 0.00 |      |      |      |      |      |      |  |
| 43 | 0.30 | 0.23 | 0.23 | 0.13 | 0.21 | 0.15 | 0.18 | 0.18 | 0.15 | 0.11 | 0.10 | 0.10 | 0.04 | 0.06 | 0.00 |      |      |      |      |      |  |
| 47 | 0.21 | 0.15 | 0.12 | 0.06 | 0.11 | 0.06 | 0.07 | 0.07 | 0.04 | 0.03 | 0.02 | 0.03 | 0.04 | 0.08 | 0.05 | 0.00 |      |      |      |      |  |
| 50 | 0.43 | 0.34 | 0.32 | 0.24 | 0.33 | 0.22 | 0.26 | 0.29 | 0.20 | 0.23 | 0.19 | 0.19 | 0.01 | 0.04 | 0.10 | 0.09 | 0.00 |      |      |      |  |
| 52 | 0.45 | 0.38 | 0.36 | 0.25 | 0.32 | 0.26 | 0.28 | 0.27 | 0.20 | 0.22 | 0.20 | 0.18 | 0.03 | 0.17 | 0.05 | 0.09 | 0.11 | 0.00 |      |      |  |
| 54 | 0.46 | 0.37 | 0.33 | 0.26 | 0.33 | 0.23 | 0.27 | 0.31 | 0.19 | 0.24 | 0.19 | 0.17 | 0.00 | 0.06 | 0.10 | 0.10 | 0.02 | 0.08 | 0.00 |      |  |
| 56 | 0.53 | 0.44 | 0.41 | 0.35 | 0.41 | 0.31 | 0.33 | 0.38 | 0.29 | 0.29 | 0.30 | 0.27 | 0.16 | 0.26 | 0.16 | 0.17 | 0.15 | 0.15 | 0.11 | 0.00 |  |
