# Supplementary material
Source: PubMed Central journal article supplement (PMC4815651)
Supplement: hdy201426x5.pdf [file hdy201426x5.pdf]

**Table S3: Center and width of the individual and constrained clines for transects A and B.** Width (in kilometers) was estimated as the inverse of the slope at the centers; centers are given as distance from the Po River along transects (in kilometers).

**Transect A**

|        | individualclines |       | bestconstrainedmodel |       |
|--------|------------------|-------|----------------------|-------|
|        | center           | width | center               | width |
| Bcal10 | 37.4             | 0.1   | 20.0                 | 2.3   |
| C203   | 44.2             | 1.5   | 20.0                 | 2.3   |
| D105   | 61.2             | 5.8   | 61.2                 | 5.8   |
| D210   | 42.8             | 0.2   | 20.0                 | 2.3   |
| D106   | 5.2              | 0.4   | 20.0                 | 2.3   |
| C205   | 19.0             | 4.5   | 20.0                 | 2.3   |
| C107   | 19.6             | 1.9   | 20.0                 | 2.3   |
| D-loop | 46.6             | 1.2   | 46.6                 | 1.2   |

**Transect B**

|        | individualclines |       | bestconstrainedmodel |       |
|--------|------------------|-------|----------------------|-------|
|        | center           | width | center               | width |
| Bcal10 | 20.8             | 8.7   | 20.5                 | 2.6   |
| C203   | 21.0             | 1.9   | 20.5                 | 2.6   |
| D105   | 24.3             | 0.5   | 20.5                 | 2.6   |
| D210   | 20.7             | 1.1   | 20.5                 | 2.6   |
| D106   | 35.2             | 2.6   | 35.2                 | 2.6   |
| C205   | 19.8             | 5.5   | 20.5                 | 2.6   |
| C107   | 20.6             | 3.3   | 20.5                 | 2.6   |
| D-loop | 96.4             | 1.9   | 96.4                 | 1.9   |
