# Supplementary material
Source: PubMed Central journal article supplement (PMC4815651)
Supplement: hdy201426x6.pdf [file hdy201426x6.pdf]

**Table S4: Likelihood search for a common center (coincidence) and slope (concordance) for eight genetic clines (seven microsatellites, mtDNA).** For each locus, constrained and unconstrained models were compared using likelihood-ratio tests (LRT). LL: log(likelihood) of the model; D: LRT statistics, significance indicated (\* = p-value < 0.05; \*\* = p-value < 0.01); loci with significant LRT were excluded from partially constrained models and fitted independently. The four models were compared globally using AIC (k: number of parameters), corrected for large numbers of parameters (AICc).

### Transect A

|                       | no constrain | Center constrained |         | Slope constrained |         | Center and slope constrained |         |
|-----------------------|--------------|--------------------|---------|-------------------|---------|------------------------------|---------|
|                       | LL           | LL                 | D       | LL                | D       | LL                           | D       |
| Bcal10                | -93.6        | -94.7              | 2.3     | -95.7             | 4.3*    | -95.0                        | 2.8     |
| C203                  | -93.2        | -95.7              | 4.95*   | -97.8             | 9.1**   | -95.7                        | 5.0     |
| D105                  | -94.2        | -99.9              | 11.5**  | -94.2             | 8.1E-02 | -99.9                        | 11.6**  |
| D210                  | -77.8        | -78.3              | 1.1     | -78.3             | 1.1     | -78.4                        | 1.2     |
| D106                  | -110.4       | -110.5             | 0.2     | -111.1            | 1.5     | -110.7                       | 0.6     |
| C205                  | -68.3        | -68.4              | 0.1     | -68.3             | 1.3E-02 | -68.4                        | 0.2     |
| C107                  | -88.2        | -88.2              | 2.8E-04 | -88.2             | 2.0E-03 | -88.2                        | 3.4E-03 |
| D-loop                | -54.2        | -58.5              | 8.7**   | -58.5             | 8.7**   | -58.5                        | 8.7*    |
| partially constrained |              | -440.2             |         | -439.7            |         | -536.3                       |         |
| all                   | -679.7       | -681.7             | 3.9     | -680.7            | 1.9     | -684.6                       | 9.7     |
| k                     | 48           | 44                 |         | 44                |         | 38                           |         |
| AIC                   | 1455.5       | 1451.4             |         | 1449.4            |         | <b>1445.2</b>                |         |
| AICc                  | 1576.1       | 1543.5             |         | 1541.5            |         | <b>1505.7</b>                |         |

### Transect B

|                       | no constrain | Center constrained |         | Slopeconstrained |         | Center and slope constrained |         |
|-----------------------|--------------|--------------------|---------|------------------|---------|------------------------------|---------|
|                       | LL           | LL                 | D       | LL               | D       | LL                           | D       |
| Bcal10                | -112.2       | -112.3             | 4.7E-02 | -112.2           | 1.8E-04 | -112.3                       | 0.1     |
| C203                  | -144.6       | -144.6             | 8.2E-03 | -144.6           | 2.0E-06 | -144.6                       | 8.8E-03 |
| D105                  | -133.1       | -133.4             | 0.5     | -133.3           | 0.3     | -134.8                       | 3.4     |
| D210                  | -102.5       | -102.9             | 0.8     | -102.5           | 6.5E-03 | -102.9                       | 0.8     |
| D106                  | -123.2       | -131.0             | 15.6**  | -123.2           | 6.7E-04 | -131.0                       | 15.6**  |
| C205                  | -104.8       | -105.0             | 0.4     | -105.0           | 0.4     | -105.0                       | 0.4     |
| C107                  | -113.7       | -113.8             | 2.0E-02 | -118.4           | 9.3**   | -114.5                       | 1.6     |
| D-loop                | -66.2        | -79.6              | 26.8**  | -79.6            | 26.8**  | -79.9                        | 27.3**  |
| partially constrained |              | -711.8             |         | -722.2           |         | -715.9                       |         |
| all                   | -900.4       | -901.3             | 1.7     | -902.2           | 3.6     | -905.3                       | 9.8     |
| k                     | 48           | 43                 |         | 43               |         | 38                           |         |
| AIC                   | 1896.8       | 1888.5             |         | 1890.4           |         | <b>1886.6</b>                |         |
| AICc                  | 1973.9       | 1945.8             |         | 1947.7           |         | <b>1928.4</b>                |         |
